# Supplementary material for: Estrogen Receptor Modulators in Viral Infections Such as SARS−CoV−2: Therapeutic Consequences
Source: MDPI journal article supplement (doi:10.3390/ijms22126551), 2021-06-18
Supplement: s1 [file s1]

## Supplementary material

### Estrogen receptor modulators in viral infections such as SARS-CoV-2: Therapeutic consequences

Nikita Abramenko, Frédéric Vellieux, Petra Tesařová, Zdeněk Kejík, Robert Kaplánek, Lukáš Lacina, Barbora Dvořánková, Daniel Rösel, Jan Brábek, Milan Jakubek and Karel Smetana Jr.

#### Content

Table S1. Molecular docking of SARS-CoV-2 main protease (M<sup>pro</sup>) with ERMs

Table S2. Molecular docking of SARS-CoV-2 papain-like protease (mono PL<sup>pro</sup>) with ERMs

Table S3. Molecular docking of SARS-CoV-2 papain-like protease (trimer PL<sup>pro</sup>) with ERMs

Figure S1. Structures of ERMs used for docking studies

Figure S2. The best docking pose of estradiol to the SARS-CoV-2 main protease (M<sup>pro</sup>)

Figure S3. The best docking pose of estrane to the SARS-CoV-2 main protease (M<sup>pro</sup>)

Figure S4. The best docking pose of estriol to the SARS-CoV-2 main protease (M<sup>pro</sup>)

Figure S5. The best docking pose of estrone to the SARS-CoV-2 main protease (M<sup>pro</sup>)

Figure S6. The best docking pose of bazedoxifen to the SARS-CoV-2 main protease (M<sup>pro</sup>)

Figure S7. The best docking pose of genistin to the SARS-CoV-2 main protease (M<sup>pro</sup>)

Figure S8. The best docking pose of raloxifene to the SARS-CoV-2 main protease (M<sup>pro</sup>)

Figure S9. The best docking pose of estradiol to the SARS-CoV-2 papain-like protease (mono PL<sup>pro</sup>)

Figure S10. The best docking pose of estrane to the SARS-CoV-2 papain-like protease (mono PL<sup>pro</sup>)

Figure S11. The best docking pose of estriol to the SARS-CoV-2 papain-like protease (mono PL<sup>pro</sup>)

Figure S12. The best docking pose of estrone to the SARS-CoV-2 papain-like protease (mono PL<sup>pro</sup>)

Figure S13. The best docking pose of bazedoxifene to the SARS-CoV-2 papain-like protease (mono PL<sup>pro</sup>)

Figure S14. The best docking pose of genistin to the SARS-CoV-2 papain-like protease (mono PL<sup>pro</sup>)

Figure S15. The best docking pose of raloxifene to the SARS-CoV-2 papain-like protease (mono PL<sup>pro</sup>)

Figure S16. The best docking pose of estradiol to the SARS-CoV-2 papain-like protease (trimer PL<sup>pro</sup>)

Figure S17. The best docking pose of estrane to the SARS-CoV-2 papain-like protease (trimer PL<sup>pro</sup>)

Figure S18. The best docking pose of estriol to the SARS-CoV-2 papain-like protease (trimer PL<sup>pro</sup>)

Figure S19. The best docking pose of estrone to the SARS-CoV-2 papain-like protease (trimer PL<sup>pro</sup>)

Figure S20. The best docking pose of bazedoxifene to the SARS-CoV-2 papain-like protease (trimer PL<sup>pro</sup>)

Figure S21. The best docking pose of genistin to the SARS-CoV-2 papain-like protease (trimer PL<sup>pro</sup>)

Figure S22. The best docking pose of raloxifene to the SARS-CoV-2 papain-like protease (trimer PL<sup>pro</sup>)

Table S1. Molecular docking of SARS-CoV-2 main protease (M<sup>pro</sup>) with ERMs

|                           | SARS-CoV-2 main protease (M <sup>pro</sup> ; PDB id 6YB7)                 |                                                                                              |                                                                               |                                                                                               |                                                                                                                |                                                                                       |                                                                               |
|---------------------------|---------------------------------------------------------------------------|----------------------------------------------------------------------------------------------|-------------------------------------------------------------------------------|-----------------------------------------------------------------------------------------------|----------------------------------------------------------------------------------------------------------------|---------------------------------------------------------------------------------------|-------------------------------------------------------------------------------|
| ERM                       | estradiol                                                                 | estrane                                                                                      | estriol                                                                       | estrone                                                                                       | bazedoxifene                                                                                                   | genistin                                                                              | raloxifene                                                                    |
| Binding energy [kcal/mol] | -7.14                                                                     | -7.59                                                                                        | -7.90                                                                         | -8.96                                                                                         | -10.13                                                                                                         | -7.70                                                                                 | -8.61                                                                         |
| Residue                   | PRO (108,132), VAL 202, GLN (110,107), ILE 200, GLU 240, GLY 109, HIS 246 | LEU 141, GLU 166, MET (165,49), CYS 145, ASN 142, SER 144, GLN 189, HIS (163,164), PHE (140) | MET 6, PRO 9, PHE (305,8), THR 304, VAL 303, ASP 235, ARG 238, GLN 233, ALA 7 | MET 6, PRO 9, PHE (305,8), THR 304, VAL 303, ASP 295, ARG 298, GLN (127, 299), ALA 7, GLY 302 | GLU (288, 290), LYS 137, THR (199, 198, 196), ASN 238, ARG 131, ASP (197, 289), TYR (237, 239), LEU (287, 286) | ARG 298, MET 6, ASP 295, GLN (127, 299), PRO 9, VAL 303, PHE (8, 305), ALA 7, THR 304 | PHE 305, ARG 298, SER 10, MET 6, PHE 8, ARG 4, PRO 9, VAL 125, ALA 7, GLN 127 |
| H-bond                    | -                                                                         | -                                                                                            | 1 ×                                                                           | -                                                                                             | 2 ×<br>BZD:O1 - ASP 289:N<br>BZD:O3 - ASN 238:2HD2                                                             | 1 ×<br>GNST:H9 - ASP 295:OD1                                                          | 1 ×<br>RLX:O4 - SER 10:HN                                                     |

Abbreviations: BZD = bazedoxifene; GNST = genistin; RLX = raloxifene

Table S2. Molecular docking of SARS-CoV-2 papain-like protease (mono PL<sup>Pro</sup>) with ERMs

|                           | SARS-CoV-2 papain-like protease (mono PL <sup>Pro</sup> ; PDB id 6W9C)                |                                                                                          |                                                                        |                                                                                       |                                                                                      |                                                                        |                                                                                                    |
|---------------------------|---------------------------------------------------------------------------------------|------------------------------------------------------------------------------------------|------------------------------------------------------------------------|---------------------------------------------------------------------------------------|--------------------------------------------------------------------------------------|------------------------------------------------------------------------|----------------------------------------------------------------------------------------------------|
| ERM                       | estradiol                                                                             | estrane                                                                                  | estriol                                                                | estrone                                                                               | bazedoxifene                                                                         | genistin                                                               | raloxifene                                                                                         |
| Binding energy [kcal/mol] | -6.86                                                                                 | -6.28                                                                                    | -6.43                                                                  | -6.94                                                                                 | -5.54                                                                                | -6.07                                                                  | -6.14                                                                                              |
| Residue                   | ASN (308,177), SER (239,180), GLU (238,124), PRO 240, CYS 181, LEU (125,178), LYS 126 | ASP (164,302), SER 245, TYR (273,264), PRO (247,248), THR 301, MET 208, ARG 166, ALA 246 | LYS (217,306), TYR (305,213), THR (257,259), GLU 214, GLY 256, PHE 258 | ASN (308,177), SER (239,180), GLU (238,124), PRO 240, CYS 181, LEU (125,178), LYS 126 | ASP 134, ASN 177, ILE 14, LYS 126, PHE 127, GLU 70, PRO 130, TYR 71, ASN 128, HIS 73 | TYR 95, LYS (91, 94), GLY 142, PRO 96, GLU 143, TRP 93, ALA (145, 144) | LEU (125, 178), SER (180, 239), ASN (177, 308), LYS 126, CYS 181, GLU (238, 124), PRO 240, ASP 179 |
| H-bond                    | 2 ×                                                                                   | -                                                                                        | 1 ×                                                                    | 2 ×                                                                                   | 2 ×<br>BZD:H34 - GLU 70:OE1 BZD:H33 - ASP 134:OD2                                    | 1 ×<br>GNST:H9 - LYS 91:O                                              | -                                                                                                  |

Abbreviations: BZD = bazedoxifene; GNST = genistin; RLX = raloxifene

Table S3. Molecular docking of SARS-CoV-2 papain-like protease (trimer PL<sup>Pro</sup>) with ERMs

|                           | SARS-CoV-2 papain-like protease (trimer PL <sup>Pro</sup> ; PDB id 6W9C)                                |                                                                   |                                                                                                                    |                                                                                                                    |                                                                                       |                                                                                                                     |                                                                                                                     |
|---------------------------|---------------------------------------------------------------------------------------------------------|-------------------------------------------------------------------|--------------------------------------------------------------------------------------------------------------------|--------------------------------------------------------------------------------------------------------------------|---------------------------------------------------------------------------------------|---------------------------------------------------------------------------------------------------------------------|---------------------------------------------------------------------------------------------------------------------|
| ERM                       | estradiol                                                                                               | estrane                                                           | estriol                                                                                                            | estrone                                                                                                            | bazedoxifene                                                                          | genistin                                                                                                            | raloxifene                                                                                                          |
| Binding energy [kcal/mol] | -7.32                                                                                                   | -7.51                                                             | -7.82                                                                                                              | -7.61                                                                                                              | -7.69                                                                                 | -6.25                                                                                                               | -7.49                                                                                                               |
| Residue                   | ASN 267-A, LEU 289-B, GLY 266-A, GLY 287-B, TRP 106-B, ALA 288-B, TYR (264,268-A), PRO 248-A, ASP 286-B | ASN 109-A,B,C, GLU 161-A, LEU 162-A,B, GLN 269-C,B,A, GLY 160-A,B | ASN 267-C, PRO 248-C, LEU 289-A, LYS 105-A, TRP 106-A, ASP 286-A, TYR (268,264-C), GLY 266-C, GLY 287-A, ALA 288-A | ASN 267-C, PRO 248-C, LEU 289-A, ALA 288-A, TRP 106-A, ASP 286-A, TYR (268,264-C), GLY 287-A, ALA 288-B, GLY 266-C | VAL 159-A, HIS 89-A, GLU 161-C, LEU 162-B, THR 158-A, GLY 160-A, ASP 108-A, ASN 109-A | ALA 288-B, LEU 289-B, GLY 287-B, GLY 266-A, TYR (268, 264-A), TRP 106-B, ASP 286-B, ASN 267-A, PRO 248-A, LYS 105-B | ASP 164-C, ALA 288-A, LYS 105-A, PRO (247, 248-C), ASP 286-A, TRP 106-A, LEU 162-C, GLY 287-A, GLU 167-C, GLY 163-C |
| H-bond                    | 2 ×                                                                                                     | -                                                                 | 4 ×                                                                                                                | 2 ×                                                                                                                | 3 ×<br>BZD:H34 - VAL 159-A:O<br>LEU 162-B:HN - BZD:O2<br>LEU 162-C:HN - BZD:O1        | 4 ×<br>TRP 106-B:HN - GNST:O4<br>TYR 268-A:HH - GNST:O2<br>GNST:H10 - GLY 266-A:O<br>ALA 288-B:HN - GNST:O4         | 3 ×<br>RLX:H27 - ASP 286-A:O<br>LYS 105-A:H22 - RLX:O2<br>ALA 288-A:HN - RLX:O4                                     |

Abbreviations: BZD = bazedoxifene; GNST = genistin; RLX = raloxifene



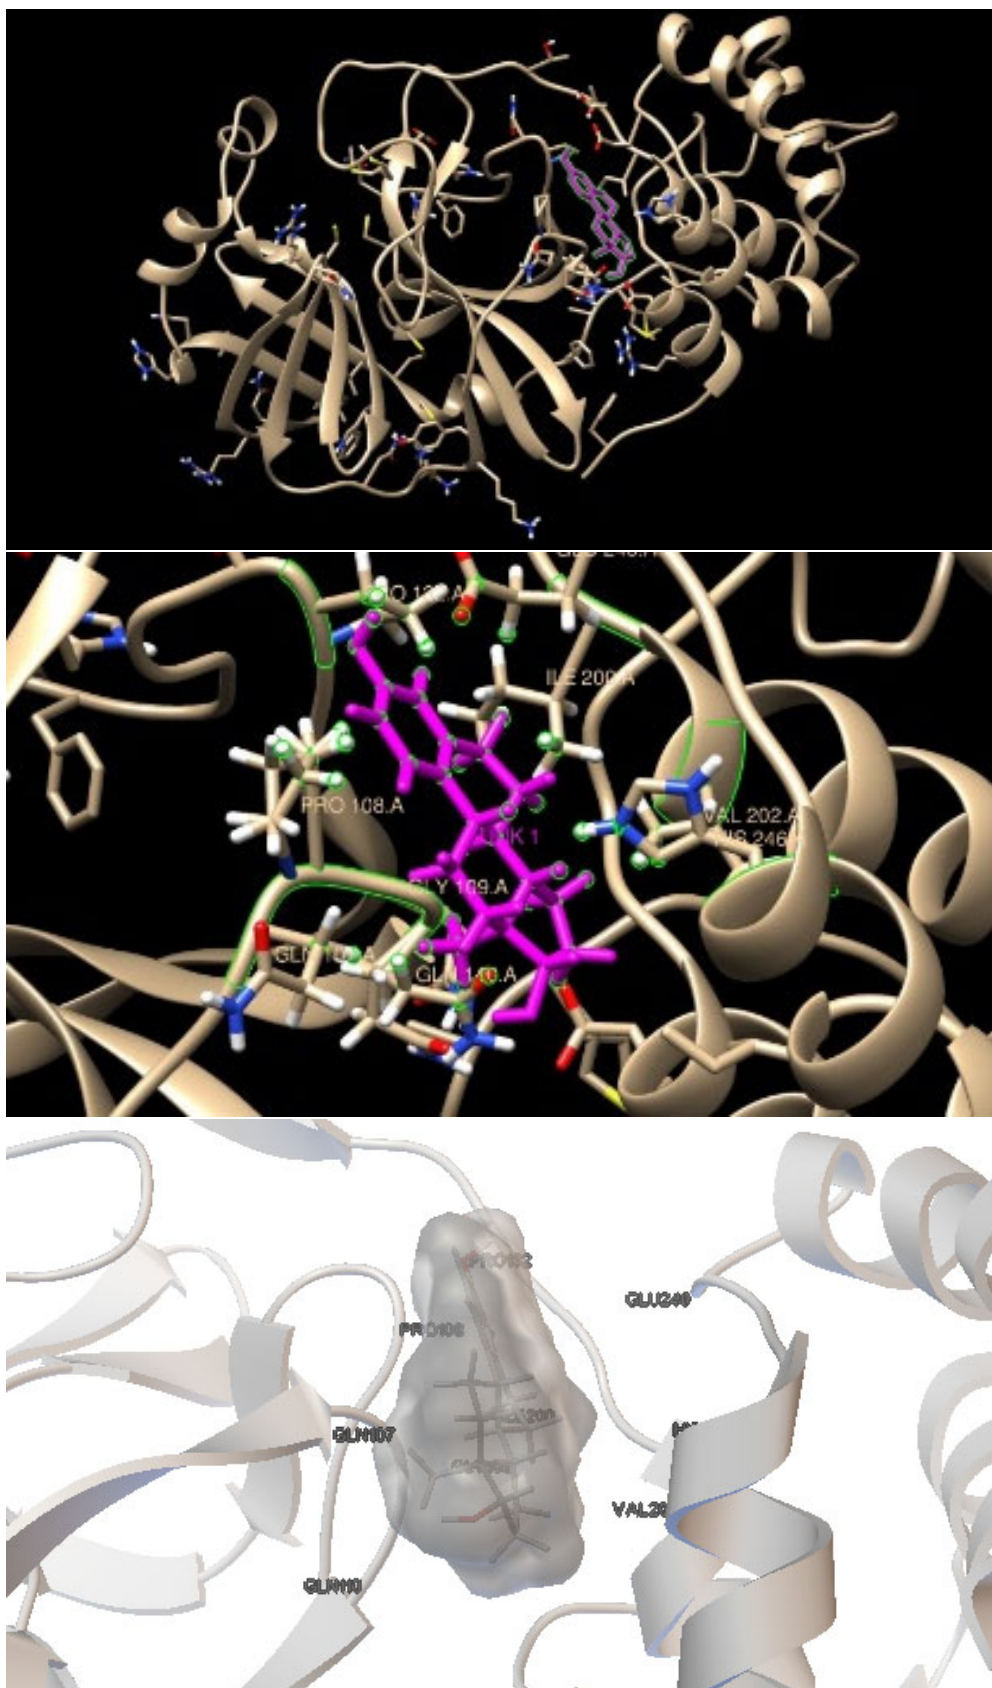

Figure S2. The best docking pose of estradiol to the SARS-CoV-2 main protease (M<sup>pro</sup>)

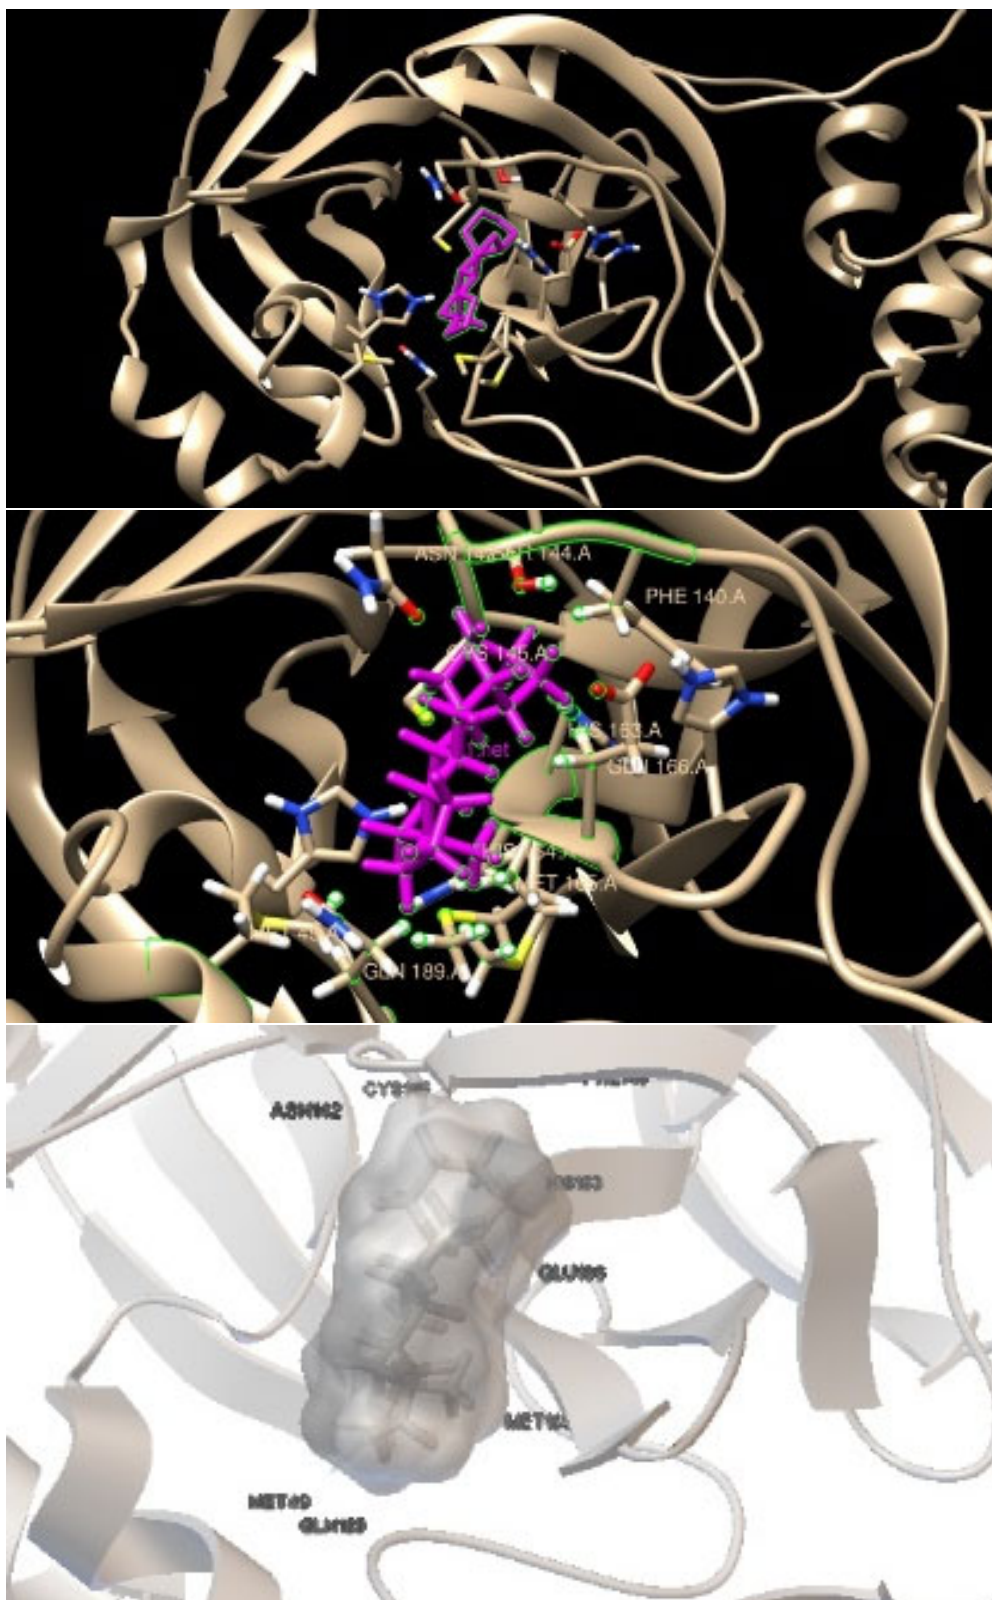

Figure S3. The best docking pose of estrane to the SARS-CoV-2 main protease (M<sup>pro</sup>)



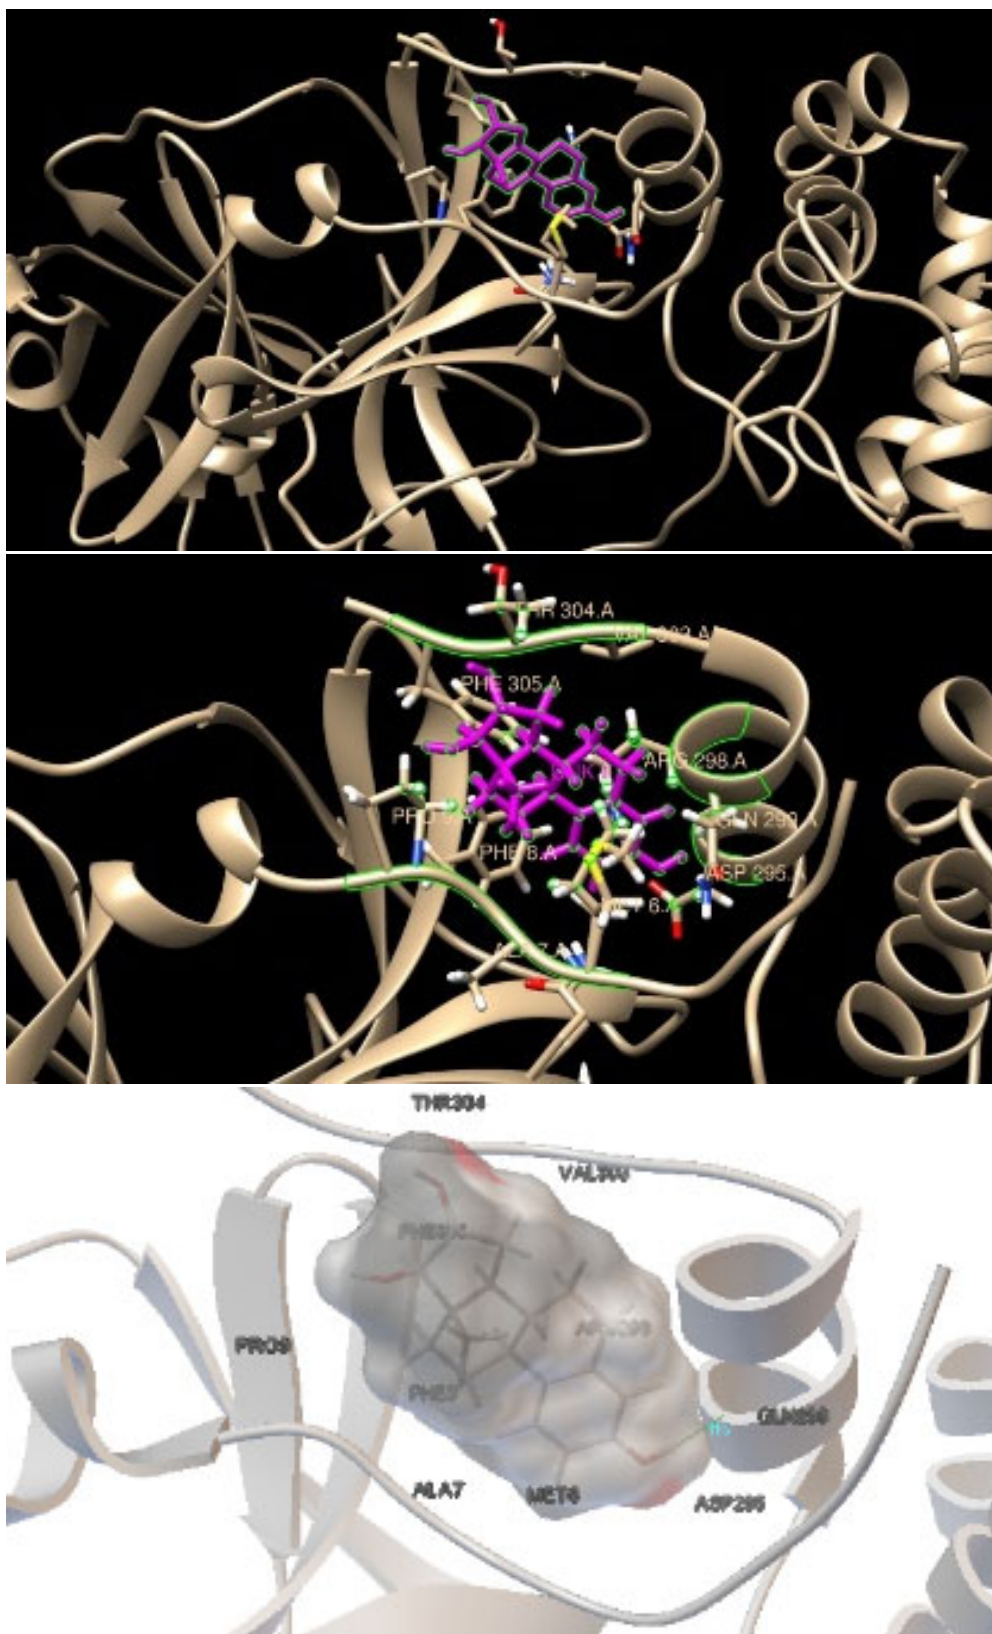

Figure S4. The best docking pose of estradiol to the SARS-CoV-2 main protease (M<sup>Pro</sup>)



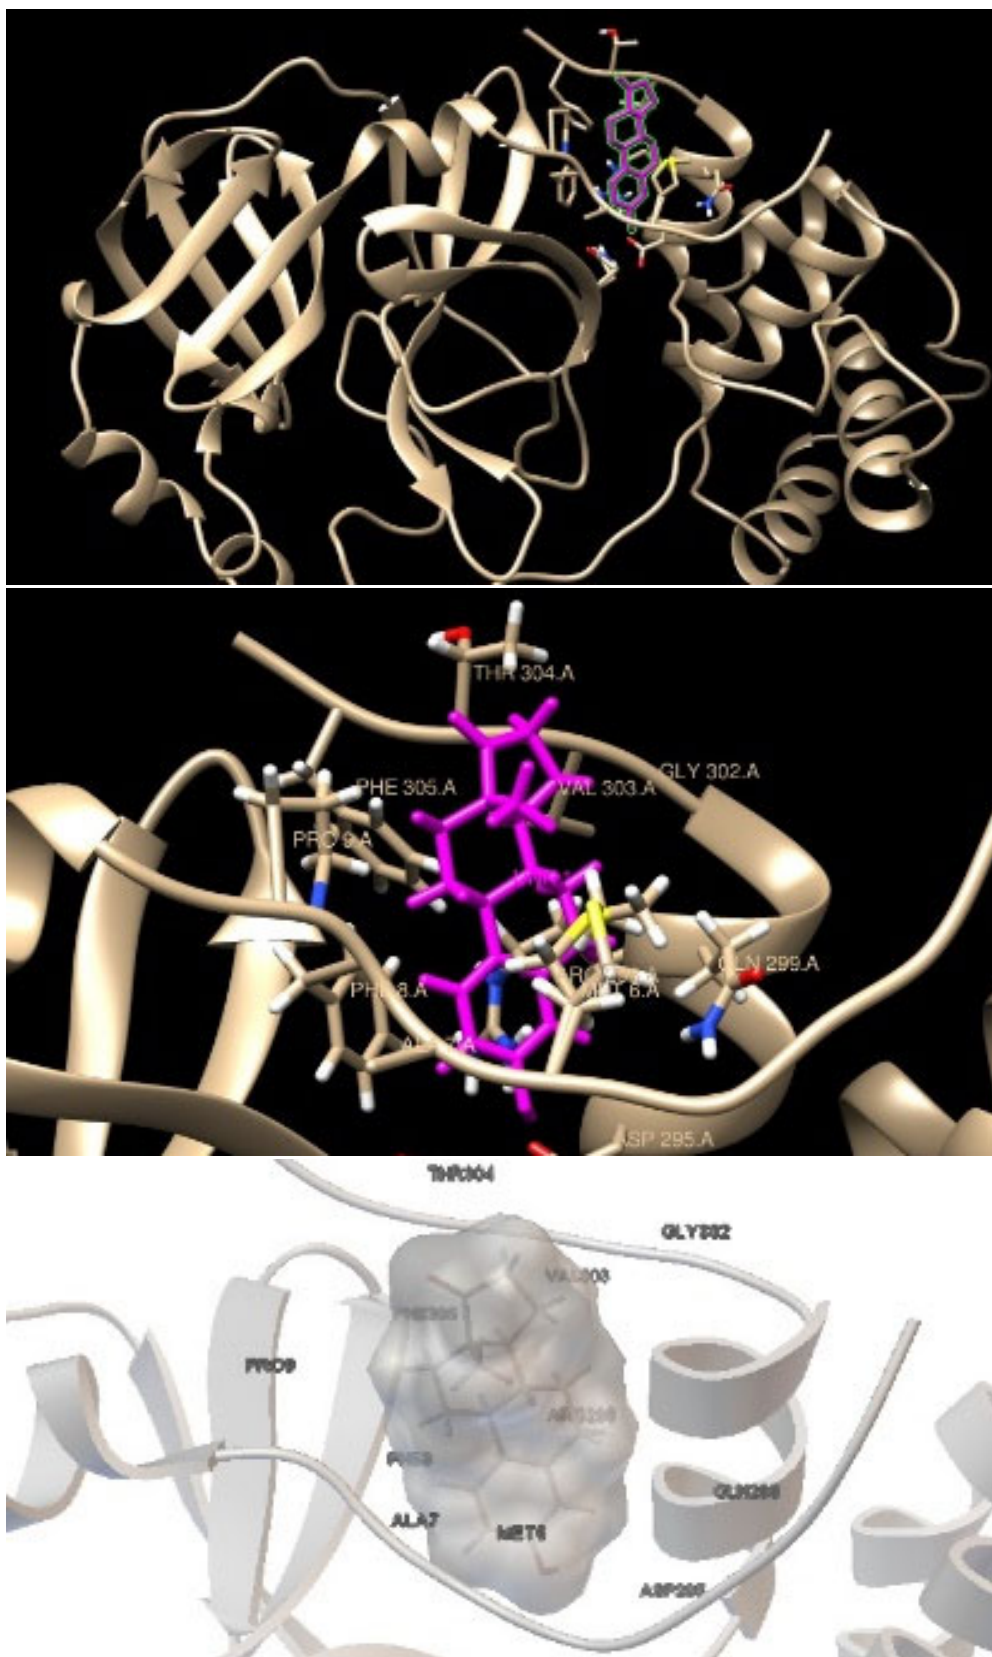

Figure S5. The best docking pose of estrone to the SARS-CoV-2 main protease (M<sup>Pro</sup>)

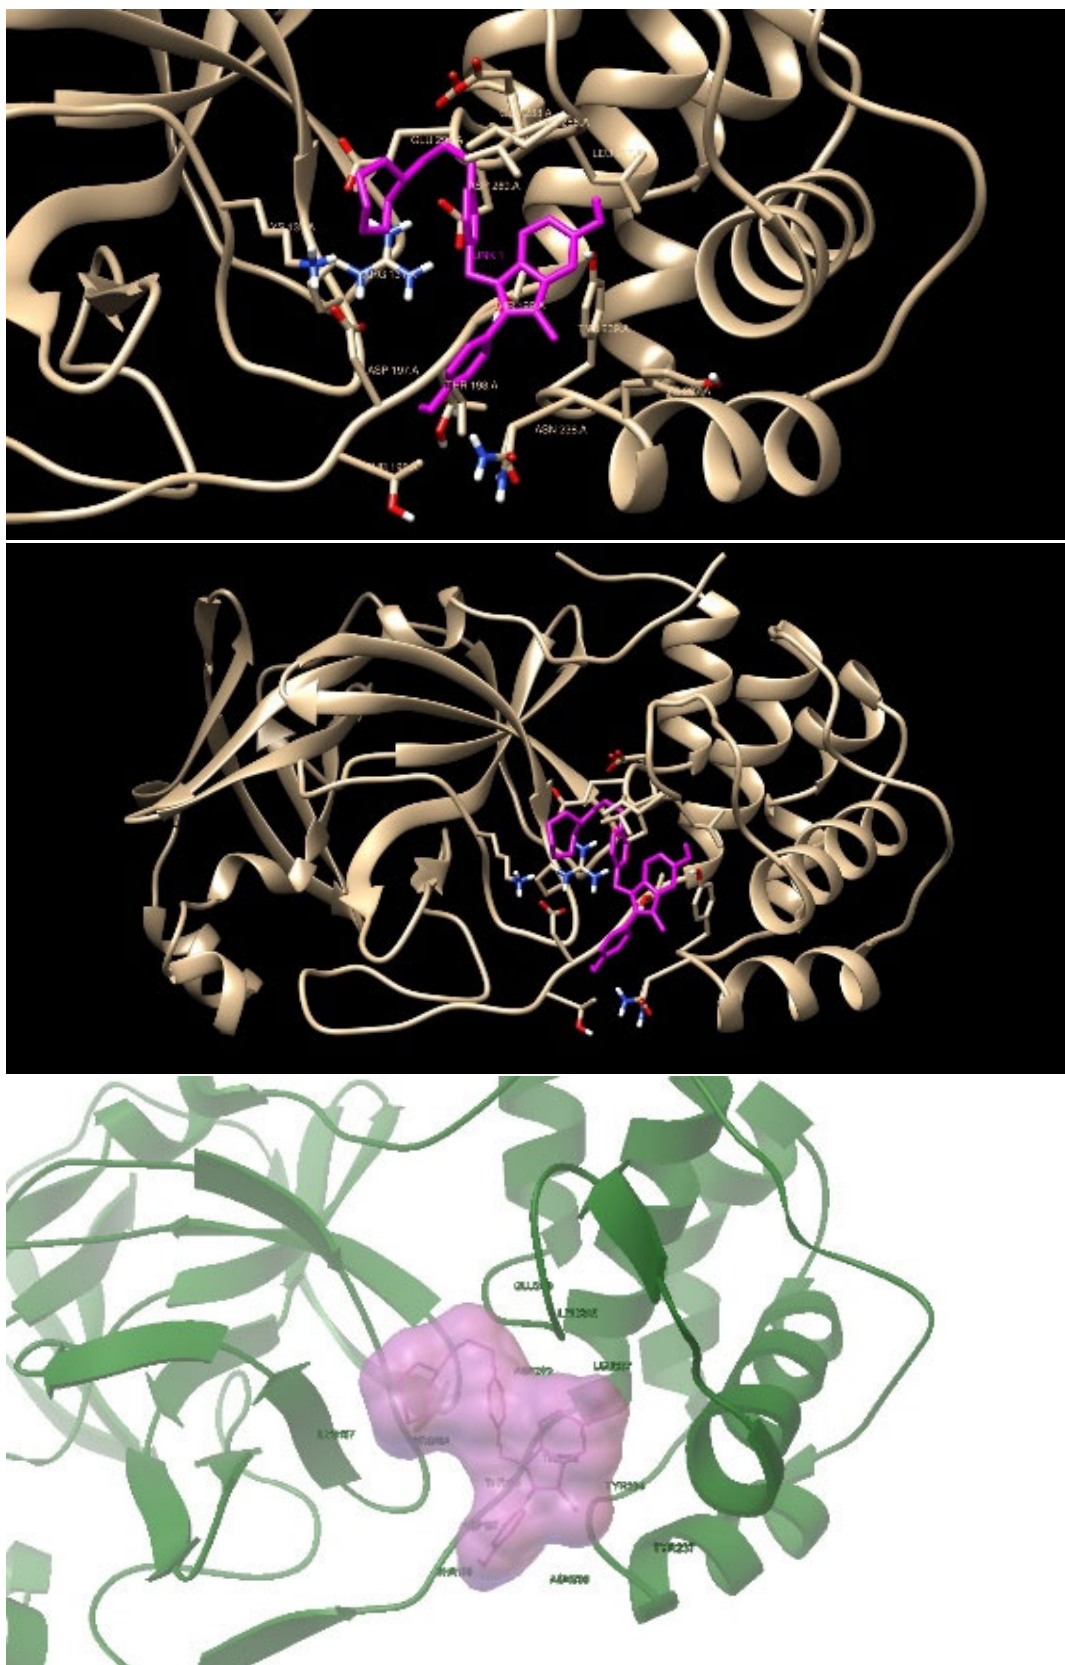

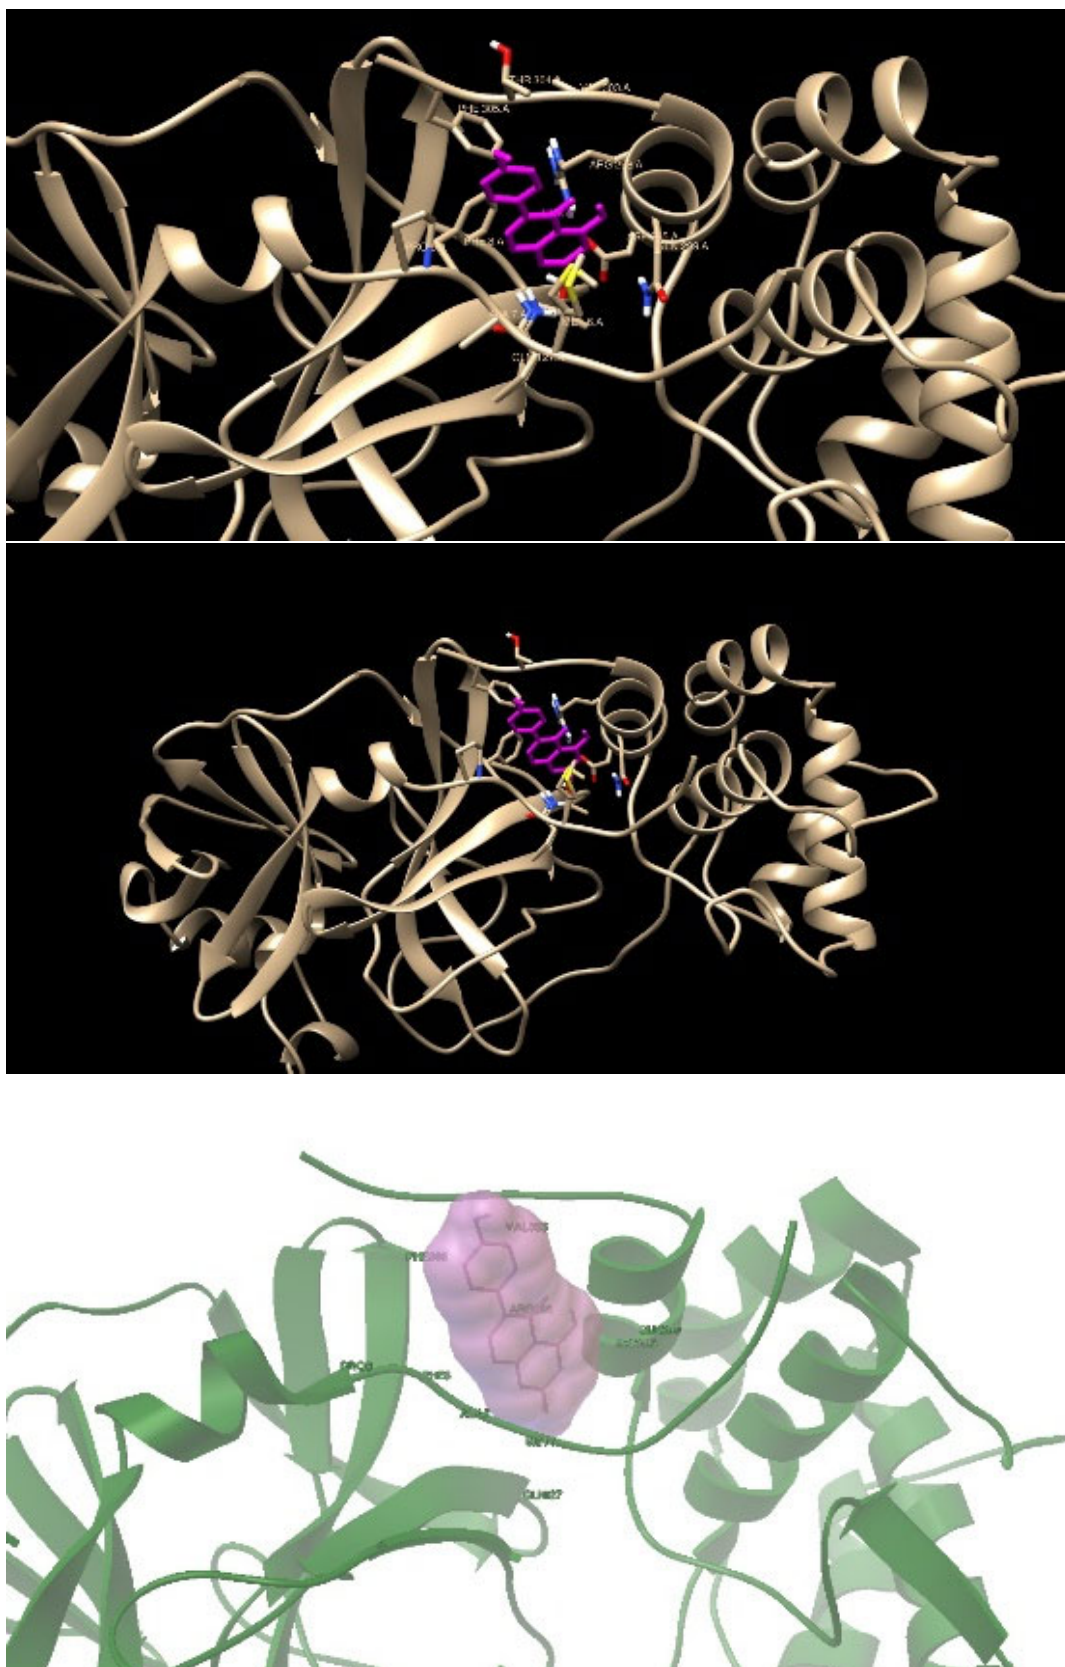

Figure S7. The best docking pose of genistin to the SARS-CoV-2 main protease (M<sup>Pro</sup>)



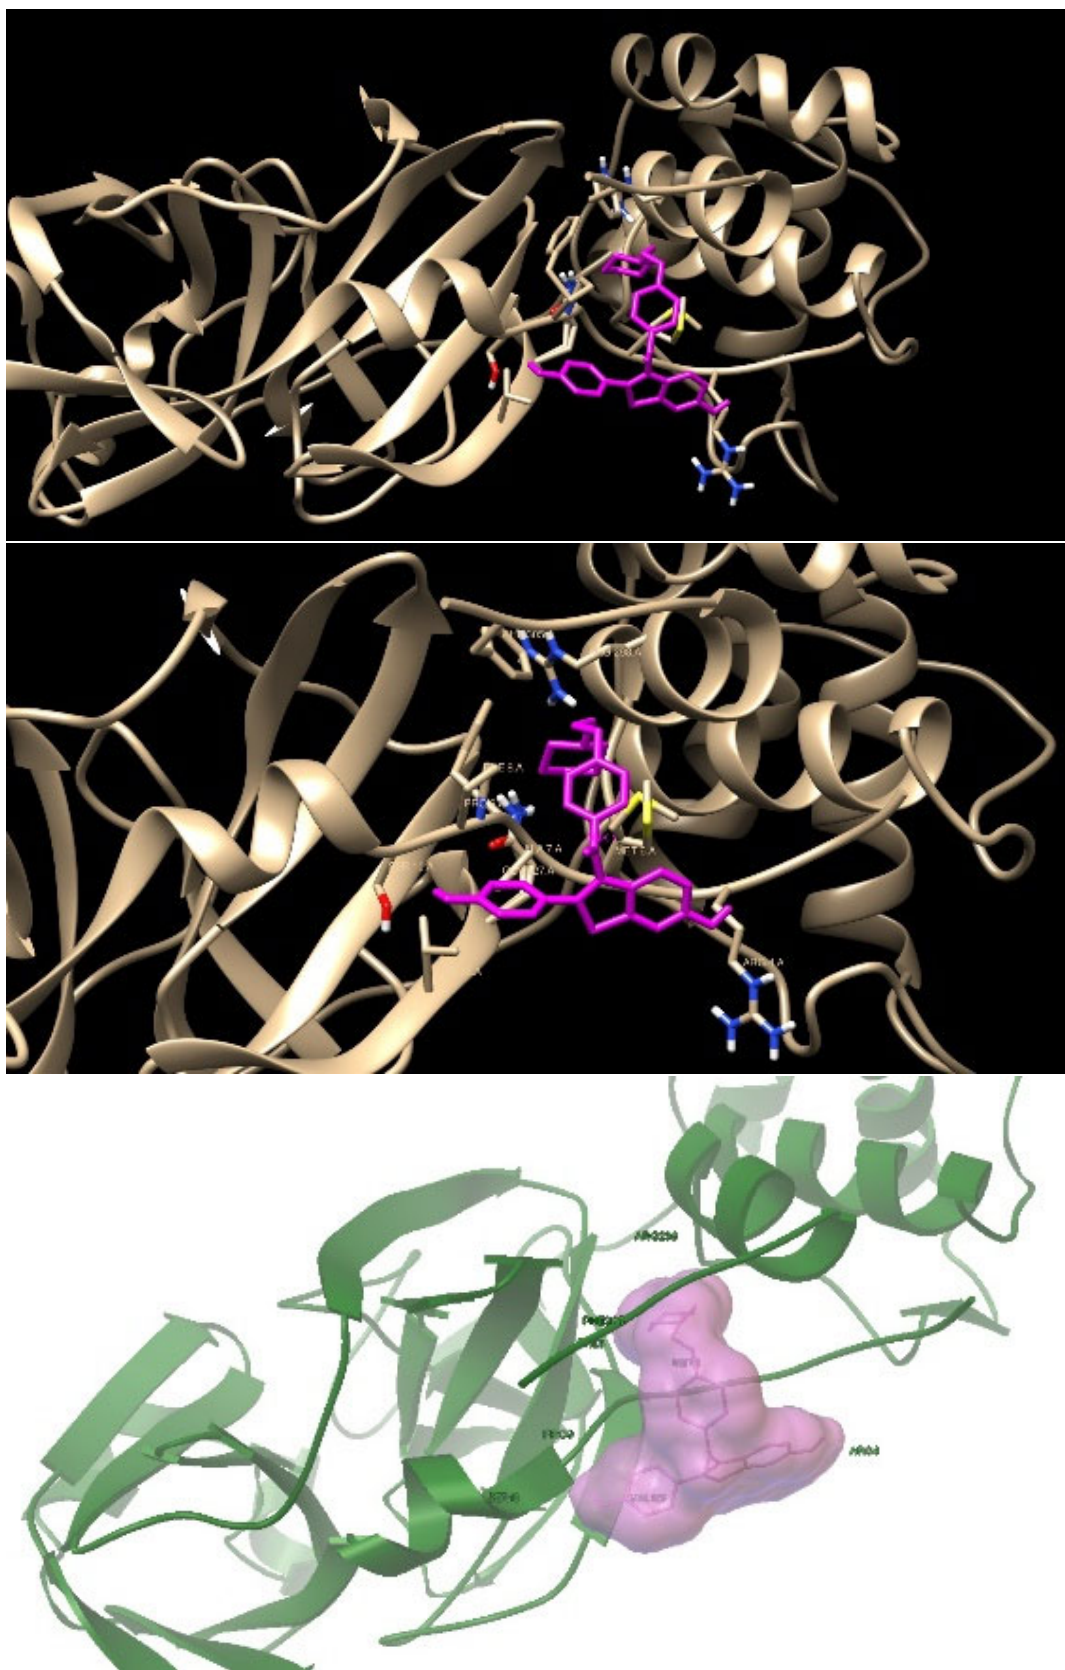

Figure S8. The best docking pose of raloxifene to the SARS-CoV-2 main protease (M<sup>pro</sup>)

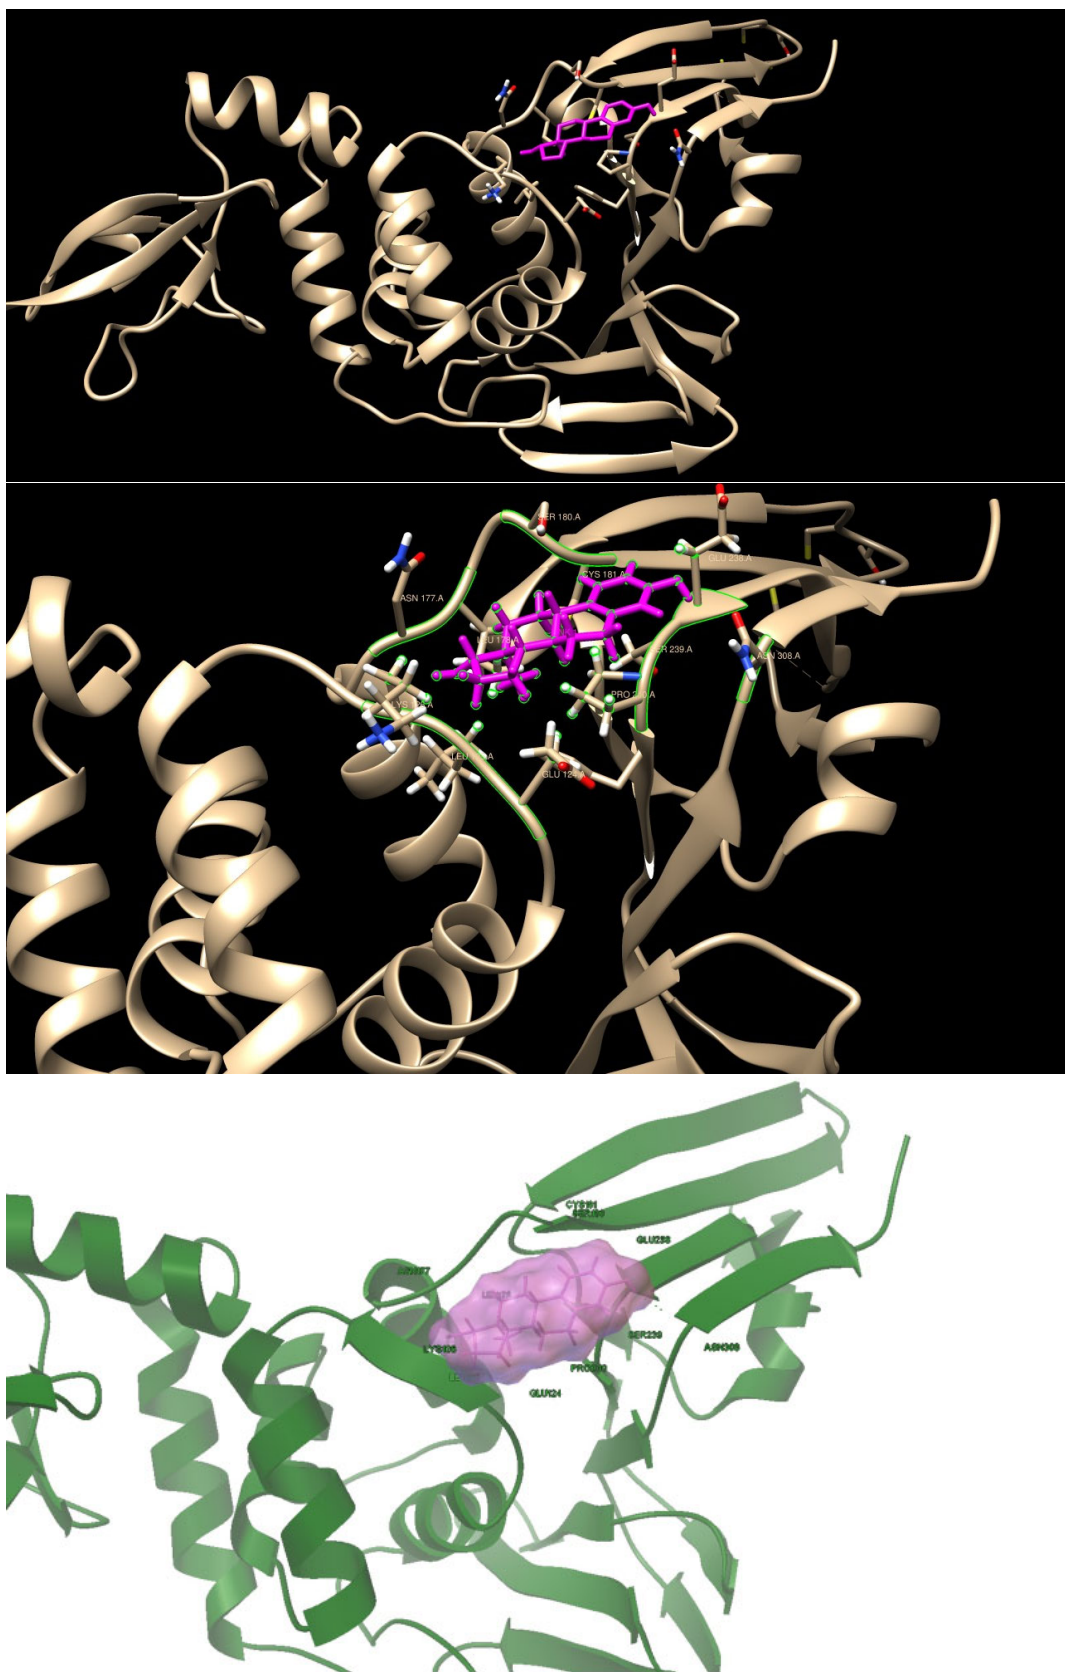

Figure S9. The best docking pose of estradiol to the SARS-CoV-2 papain-like protease (mono PL<sup>pro</sup>)

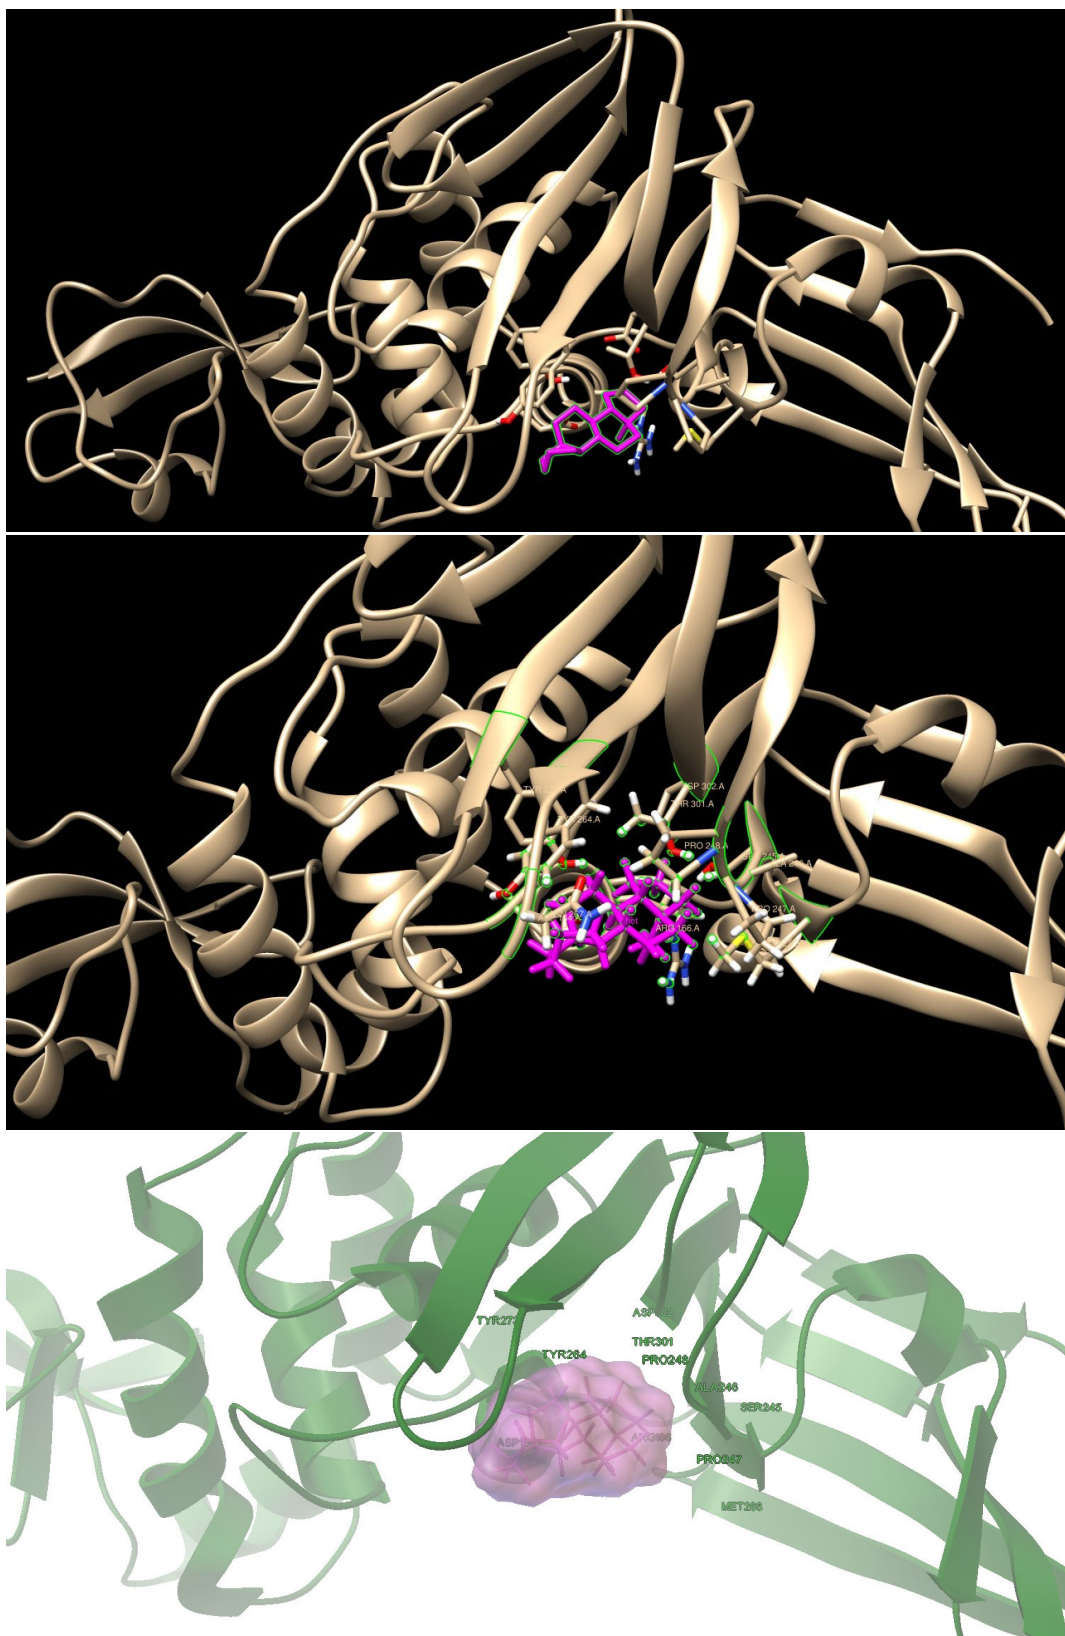

Figure S10. The best docking pose of estrane to the SARS-CoV-2 papain-like protease (mono PL<sup>pro</sup>)



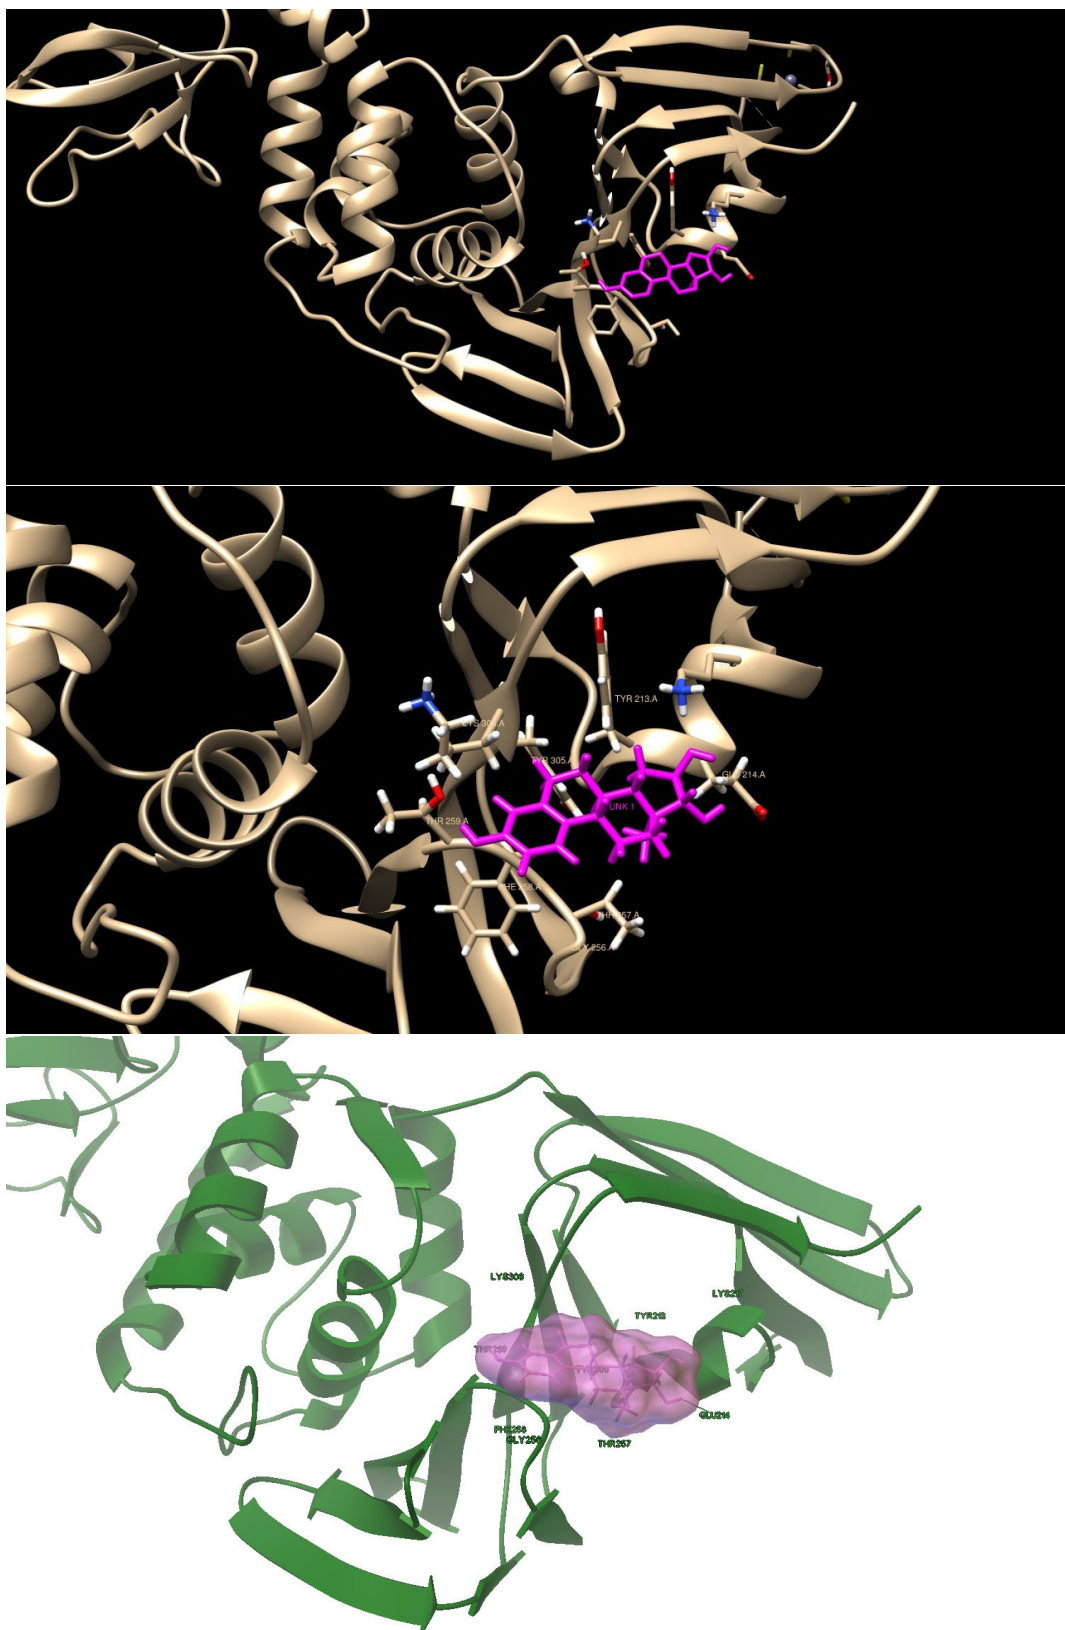

Figure S11. The best docking pose of estriol to the SARS-CoV-2 papain-like protease (mono PL<sup>pro</sup>)

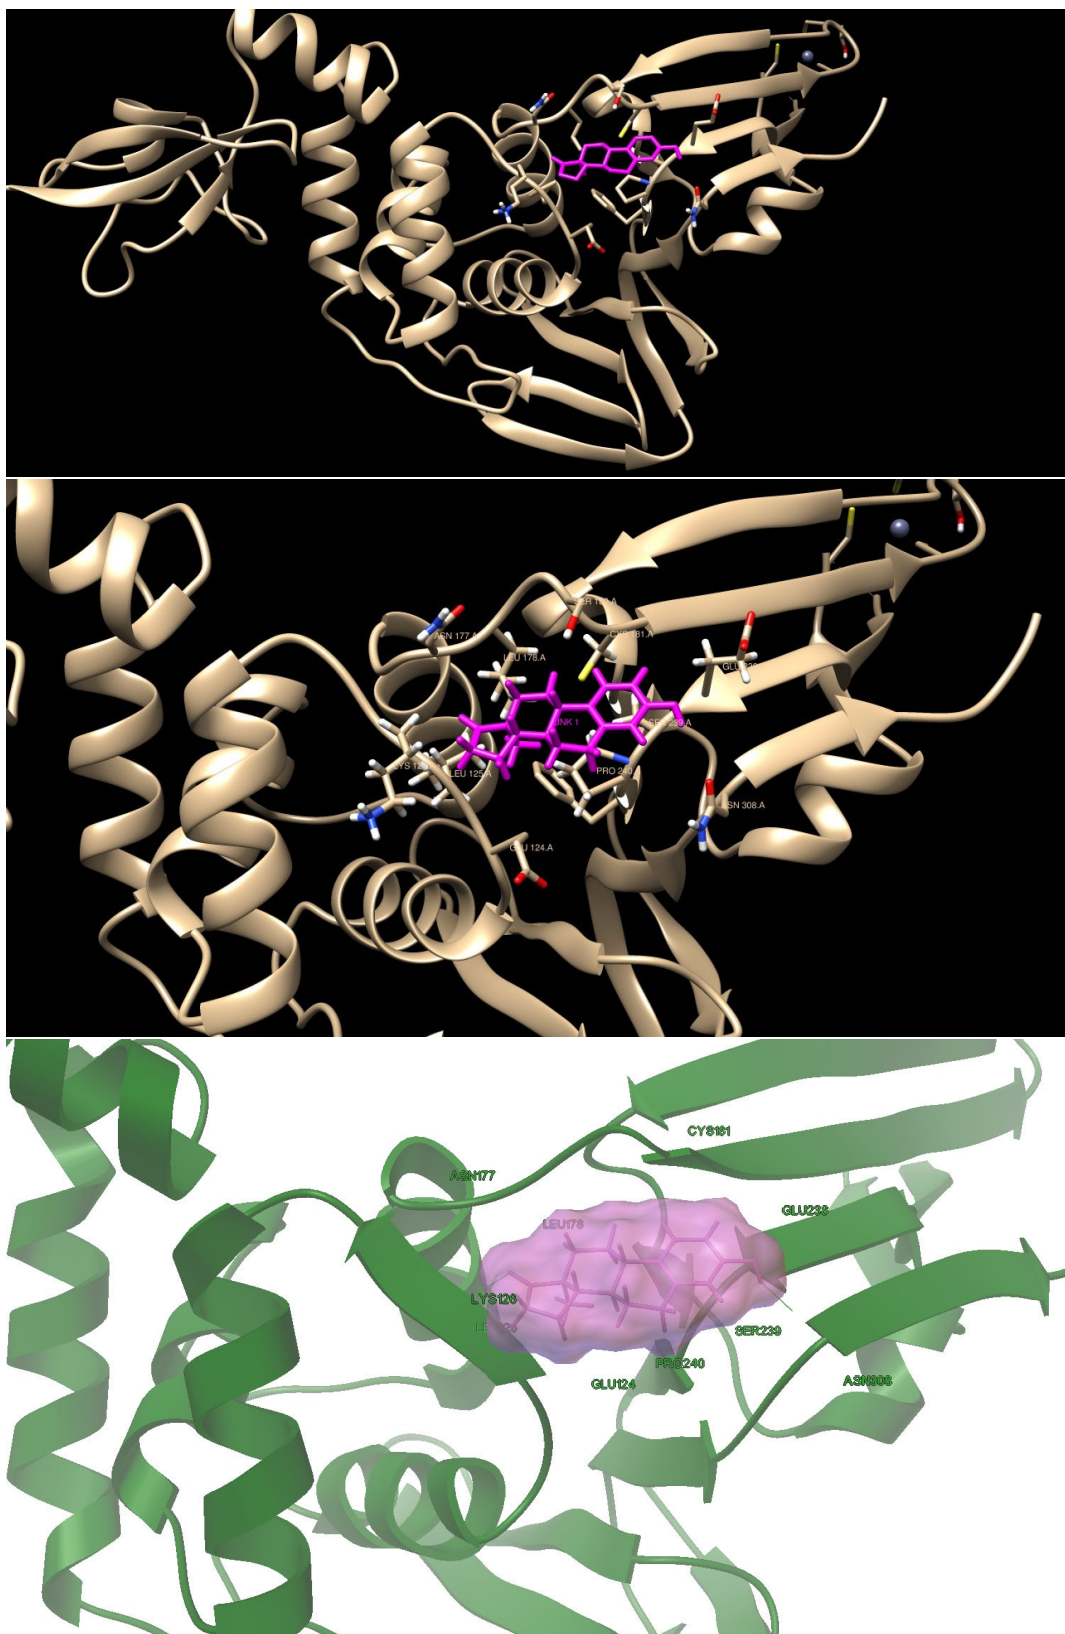

Figure S12. The best docking pose of estrone to the SARS-CoV-2 papain-like protease (mono PL<sup>pro</sup>)





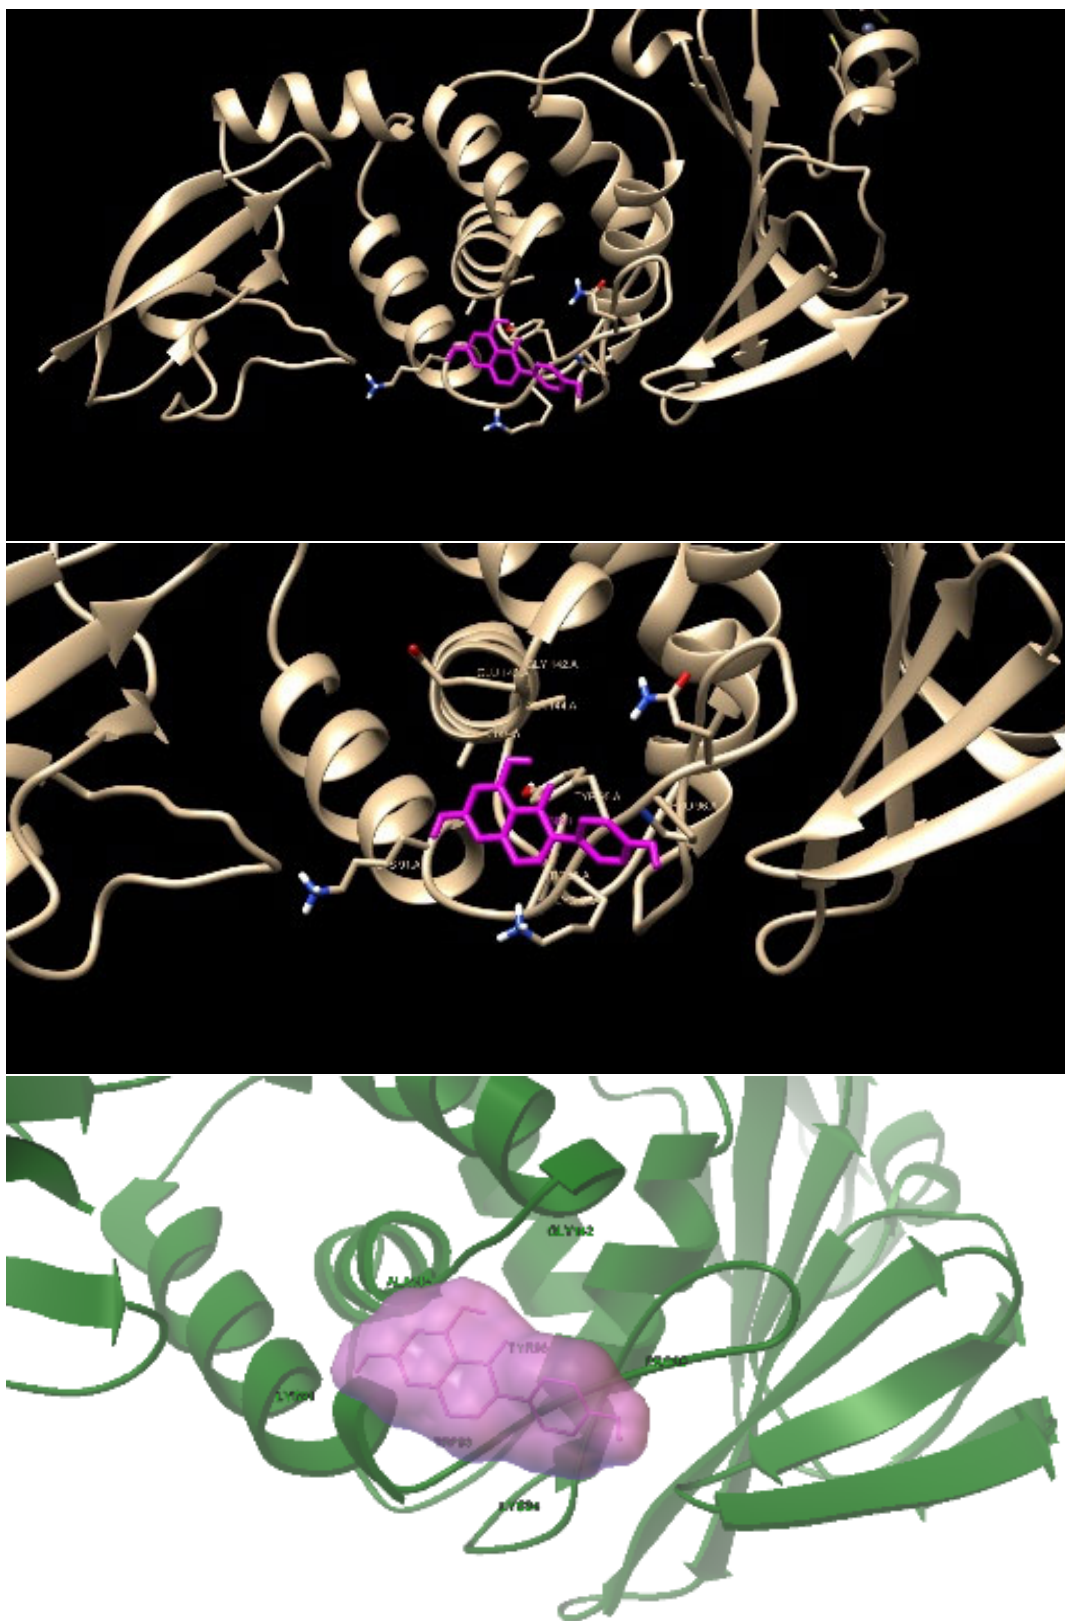

Figure S14. The best docking pose of genistein to the SARS-CoV-2 papain-like protease (mono PL<sup>pro</sup>)

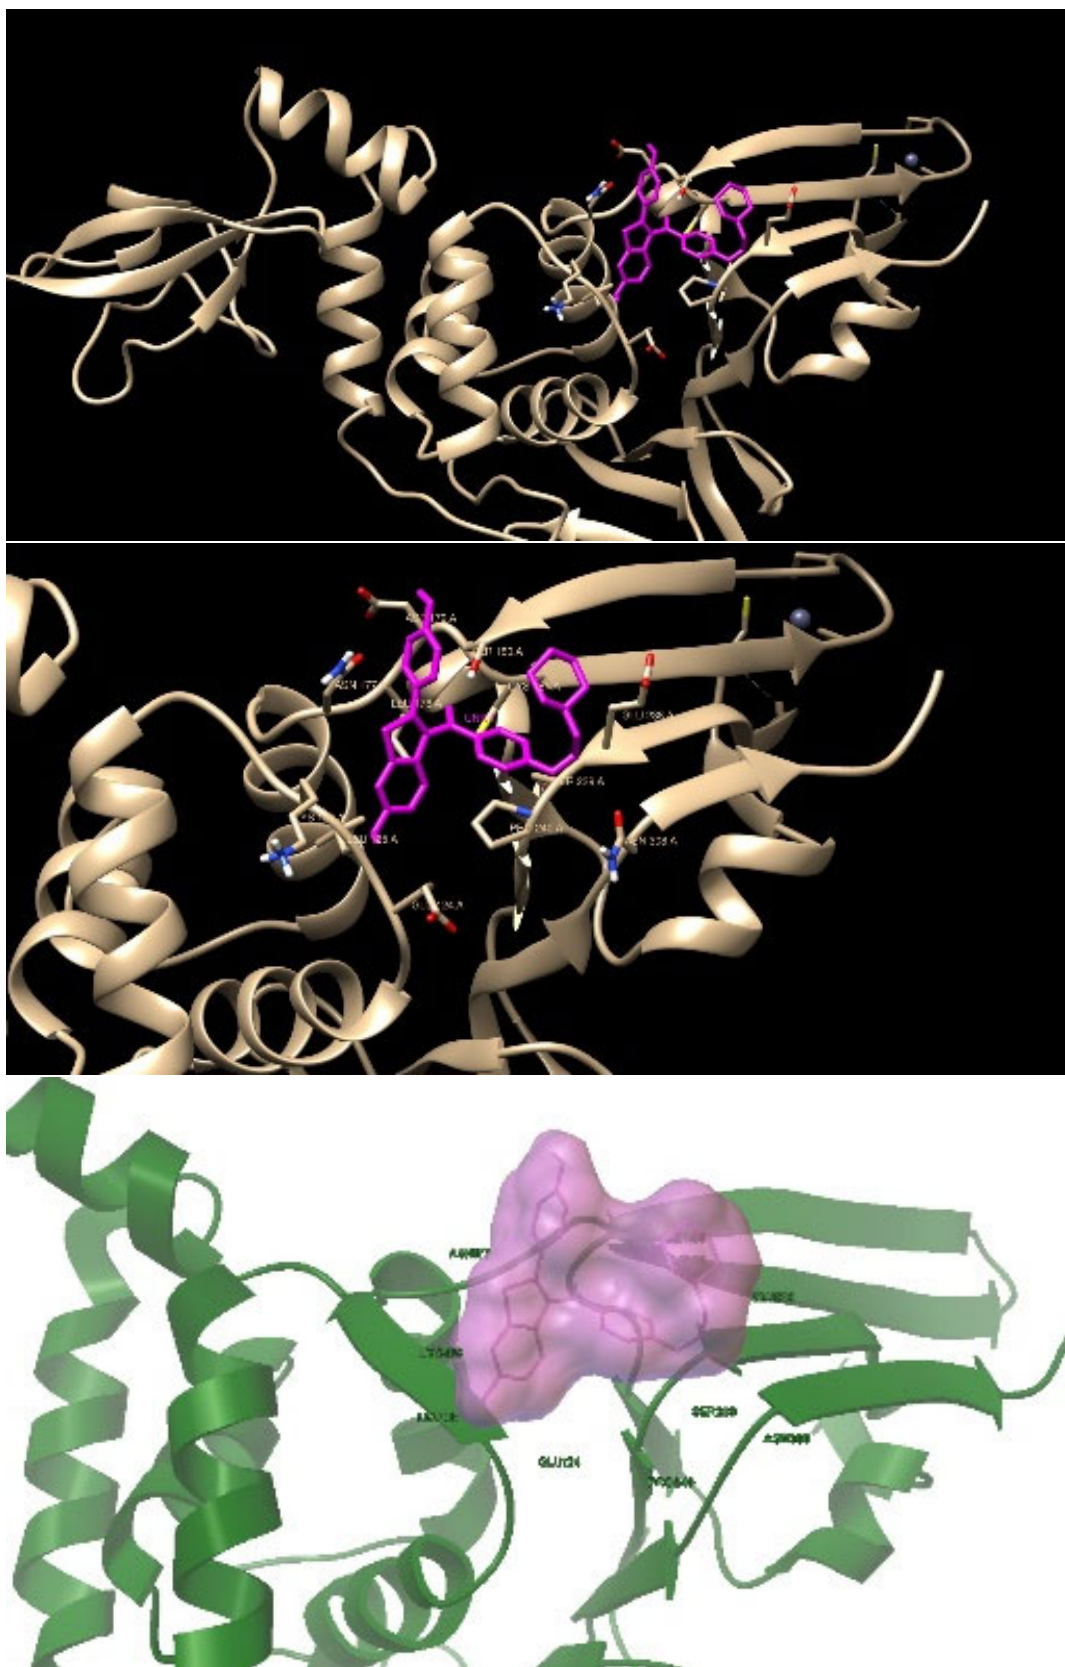

Figure S15. The best docking pose of raloxifene to the SARS-CoV-2 papain-like protease (mono PL<sup>pro</sup>)

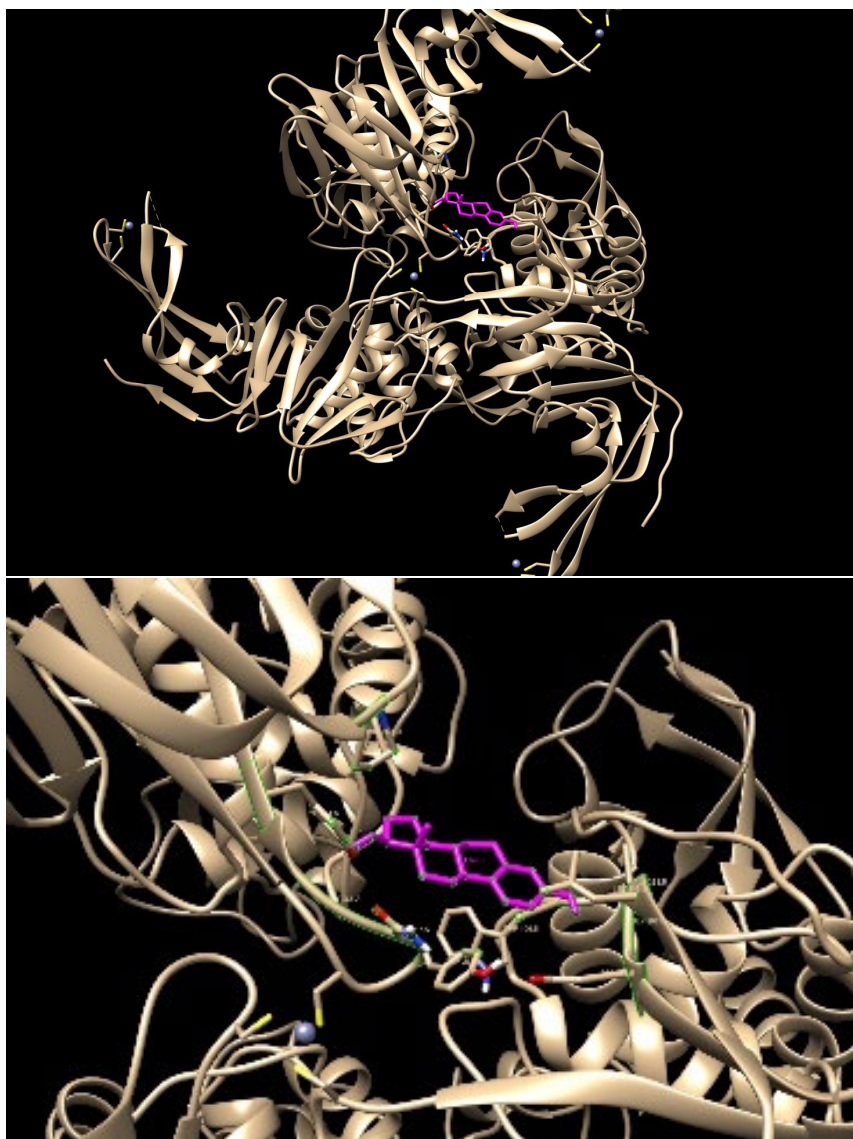

Figure S16. The best docking pose of estradiol to the SARS-CoV-2 papain-like protease (trimer PL<sup>pro</sup>)





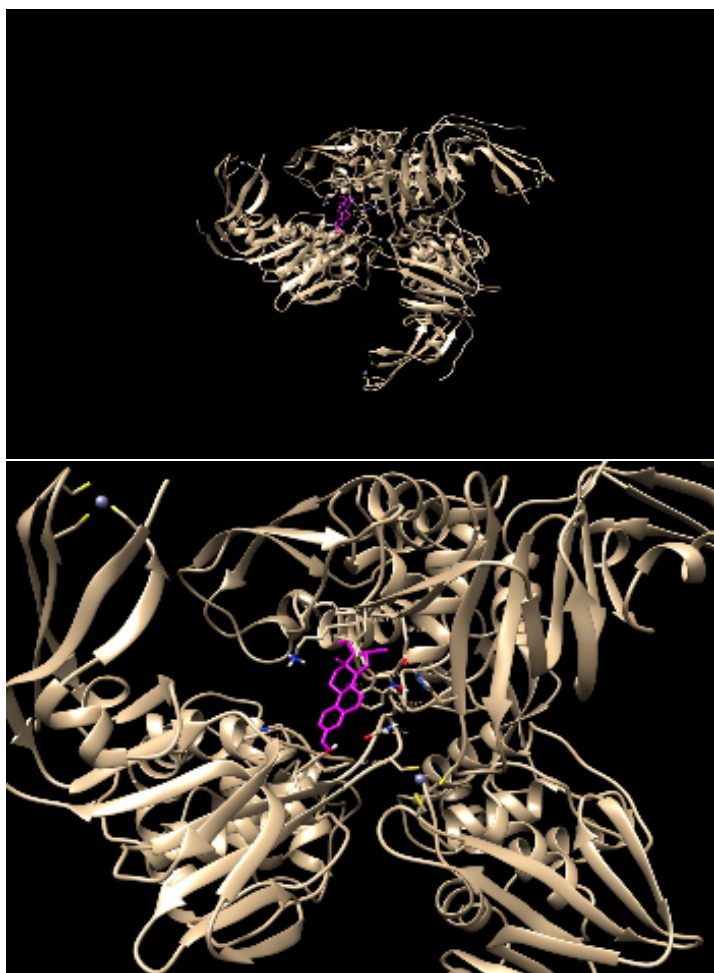

Figure S18. The best docking pose of estriol to the SARS-CoV-2 papain-like protease (trimer PL<sup>pro</sup>)

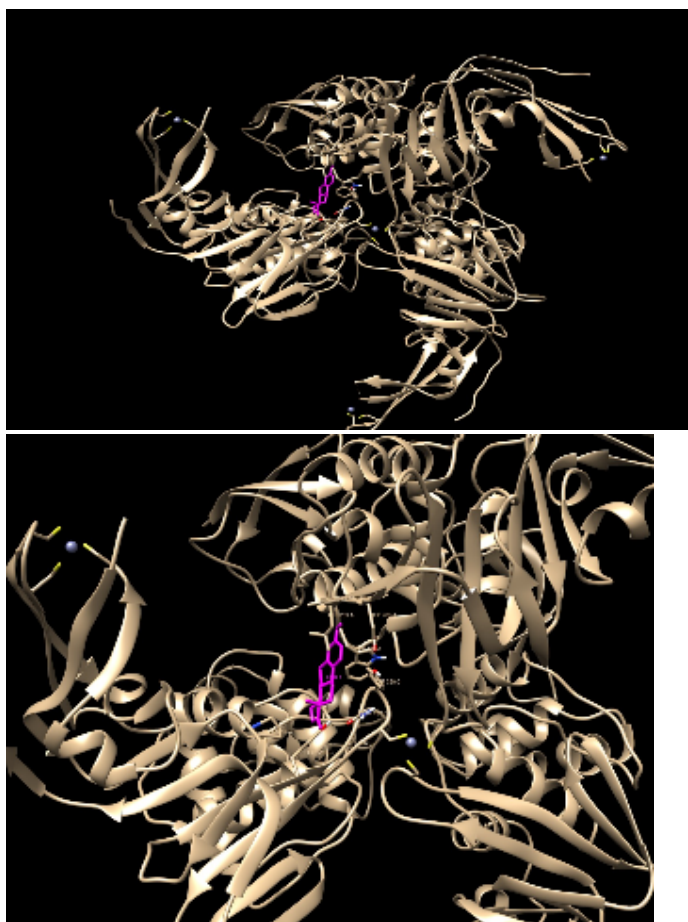

Figure S19. The best docking pose of estrone to the SARS-CoV-2 papain-like protease (trimer PL<sup>pro</sup>)

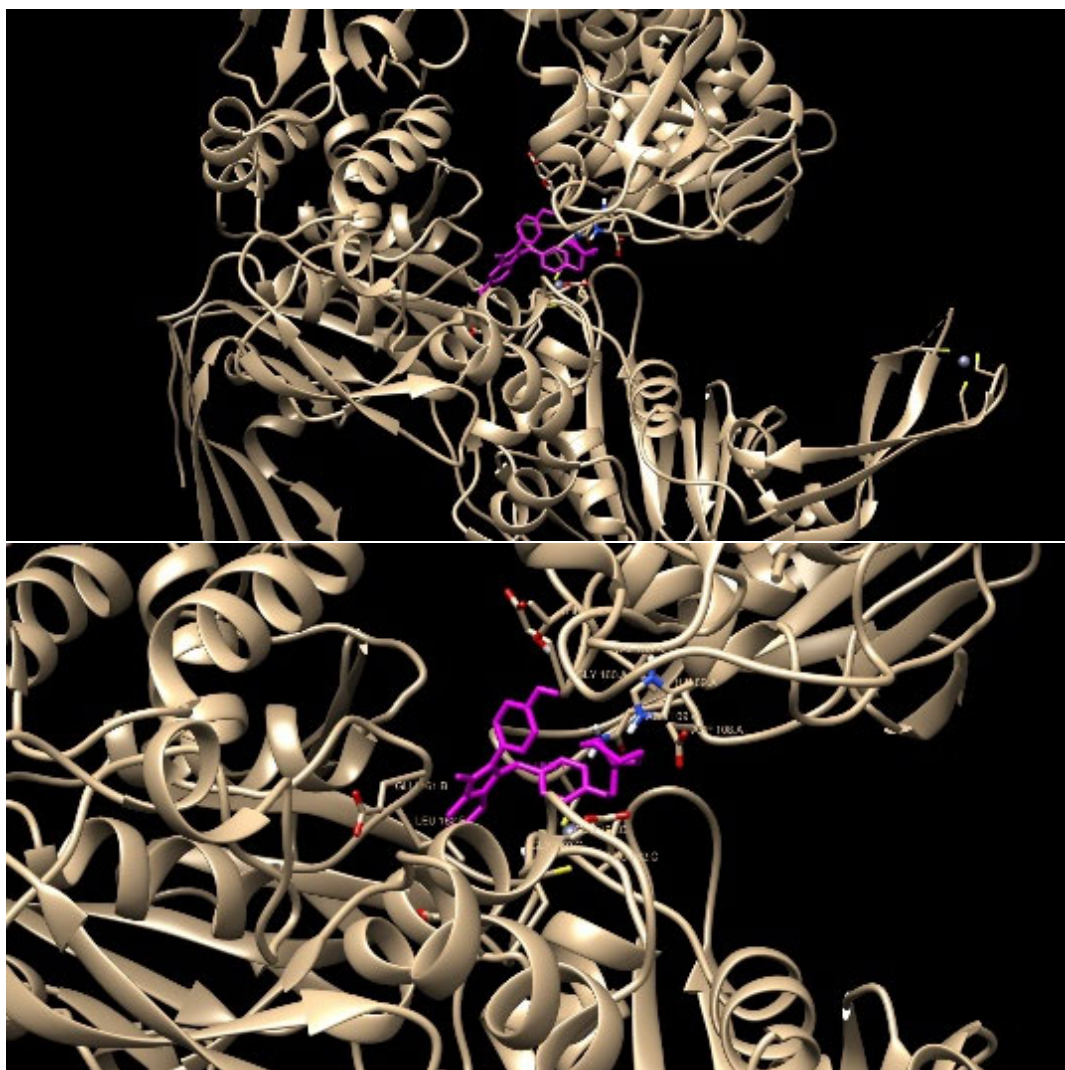

Figure S20. The best docking pose of bazedoxifene to the SARS-CoV-2 papain-like protease (trimer PL<sup>pro</sup>)



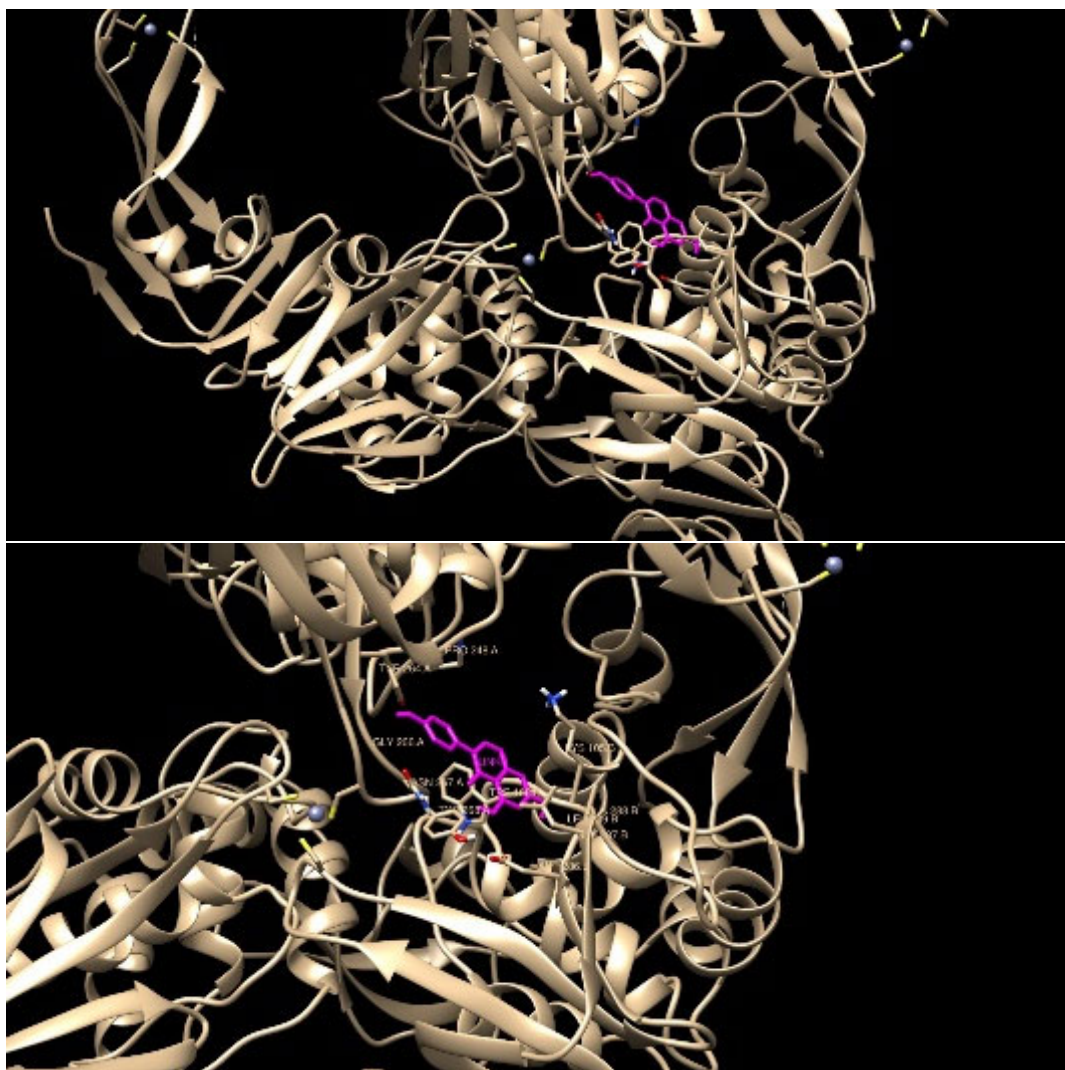

Figure S21. The best docking pose of genistein to the SARS-CoV-2 papain-like protease (trimer PL<sup>pro</sup>)

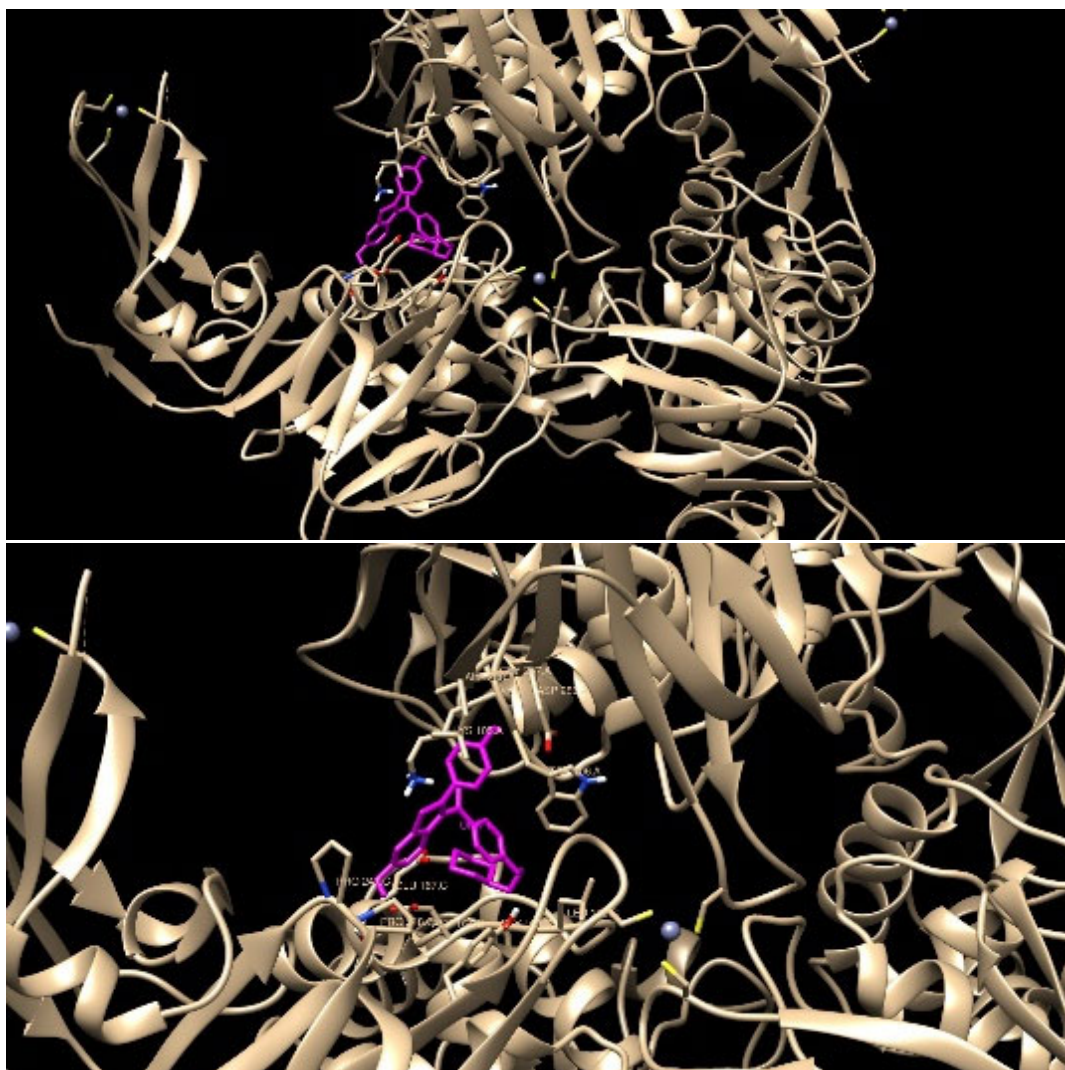

Figure S22. The best docking pose of raloxifene to the SARS-CoV-2 papain-like protease (trimer PL<sup>pro</sup>)
